# Supplementary material for: Opposing changes in subpolar ocean heat content due to meridional heat advection driven by the Southern Ocean wind anomaly
Source: Copernicus journal article supplement (doi:10.5194/egusphere-2024-816), 2024-03-27
Supplement: Supplementary file [file egusphere-2024-816-AC1-supplement.zip]

# CERTIFICATE

## OF ENGLISH LANGUAGE EDITING

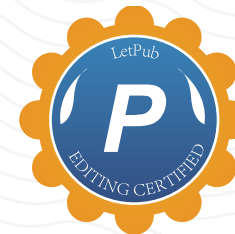

### Opposing subpolar changes in ocean heat content due to the Subantarctic Front shifting in the upper Southern Ocean

The global ocean has been warming significantly due to rapid climate change, leading to conspicuous changes in the subpolar Southern Ocean. The Subantarctic Front (SAF) plays an important role in modulating changes in regional ocean heat content (OHC) through meridional heat advections. However, the influence of the SAF shift has been overlooked in the past based on its overall weak trend. In this study, we used observed objective analysis and reanalysis datasets to explore the changes in subpolar ocean heat content and analyze attributions to the remarkable regional discrepancy. We found a notable difference in the direction of OHC trends between the Atlantic–Indian sector and the Pacific sector, which could be attributed to the inverse meridional heat advection caused by the SAF shift. Atlantic–Indian sector warming was significantly modulated by increasing meridional heat advection induced by the poleward SAF. In the Pacific sector, the equatorward SAF resulted in substantial cold

This document certifies that the manuscript listed above was copy edited for English language by LetPub, with regard to grammar, punctuation, spelling, and clarity. Documents receiving this certification should be regarded as having undergone professional editorial revision for English language before submission. However, the authors may accept or reject LetPub's suggestions and changes at their own discretion and LetPub does not have editorial control over the submitted documents. Submitted documents may have new text that was not provided to LetPub for review. Please use the verification link below to determine the validity of the submitted version.

November 15, 2023

Date of Revision

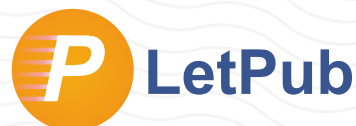

LetPub is an author service brand owned and operated by Accdon LLC.  
Tel: 1-781-202-9968 Email: info@accdon.com  
Address: 400 Fifth Ave, Suite 530, Waltham, MA 02451, United States

This manuscript has been individually edited for grammar, punctuation, spelling, and clarity. You may verify the authenticity of this certificate on our website (<https://www.letpub.com/editorial-certificate>) at any time using this manuscript's unique code: PR\_231102H204Y v231110.
